# Supplementary material for: Annual body mass index gain and risk of hypertensive disorders of pregnancy in a subsequent pregnancy
Source: PubMed Central journal article supplement (PMC8602630; doi:10.1038/s41598-021-01976-y), 2021-11-18

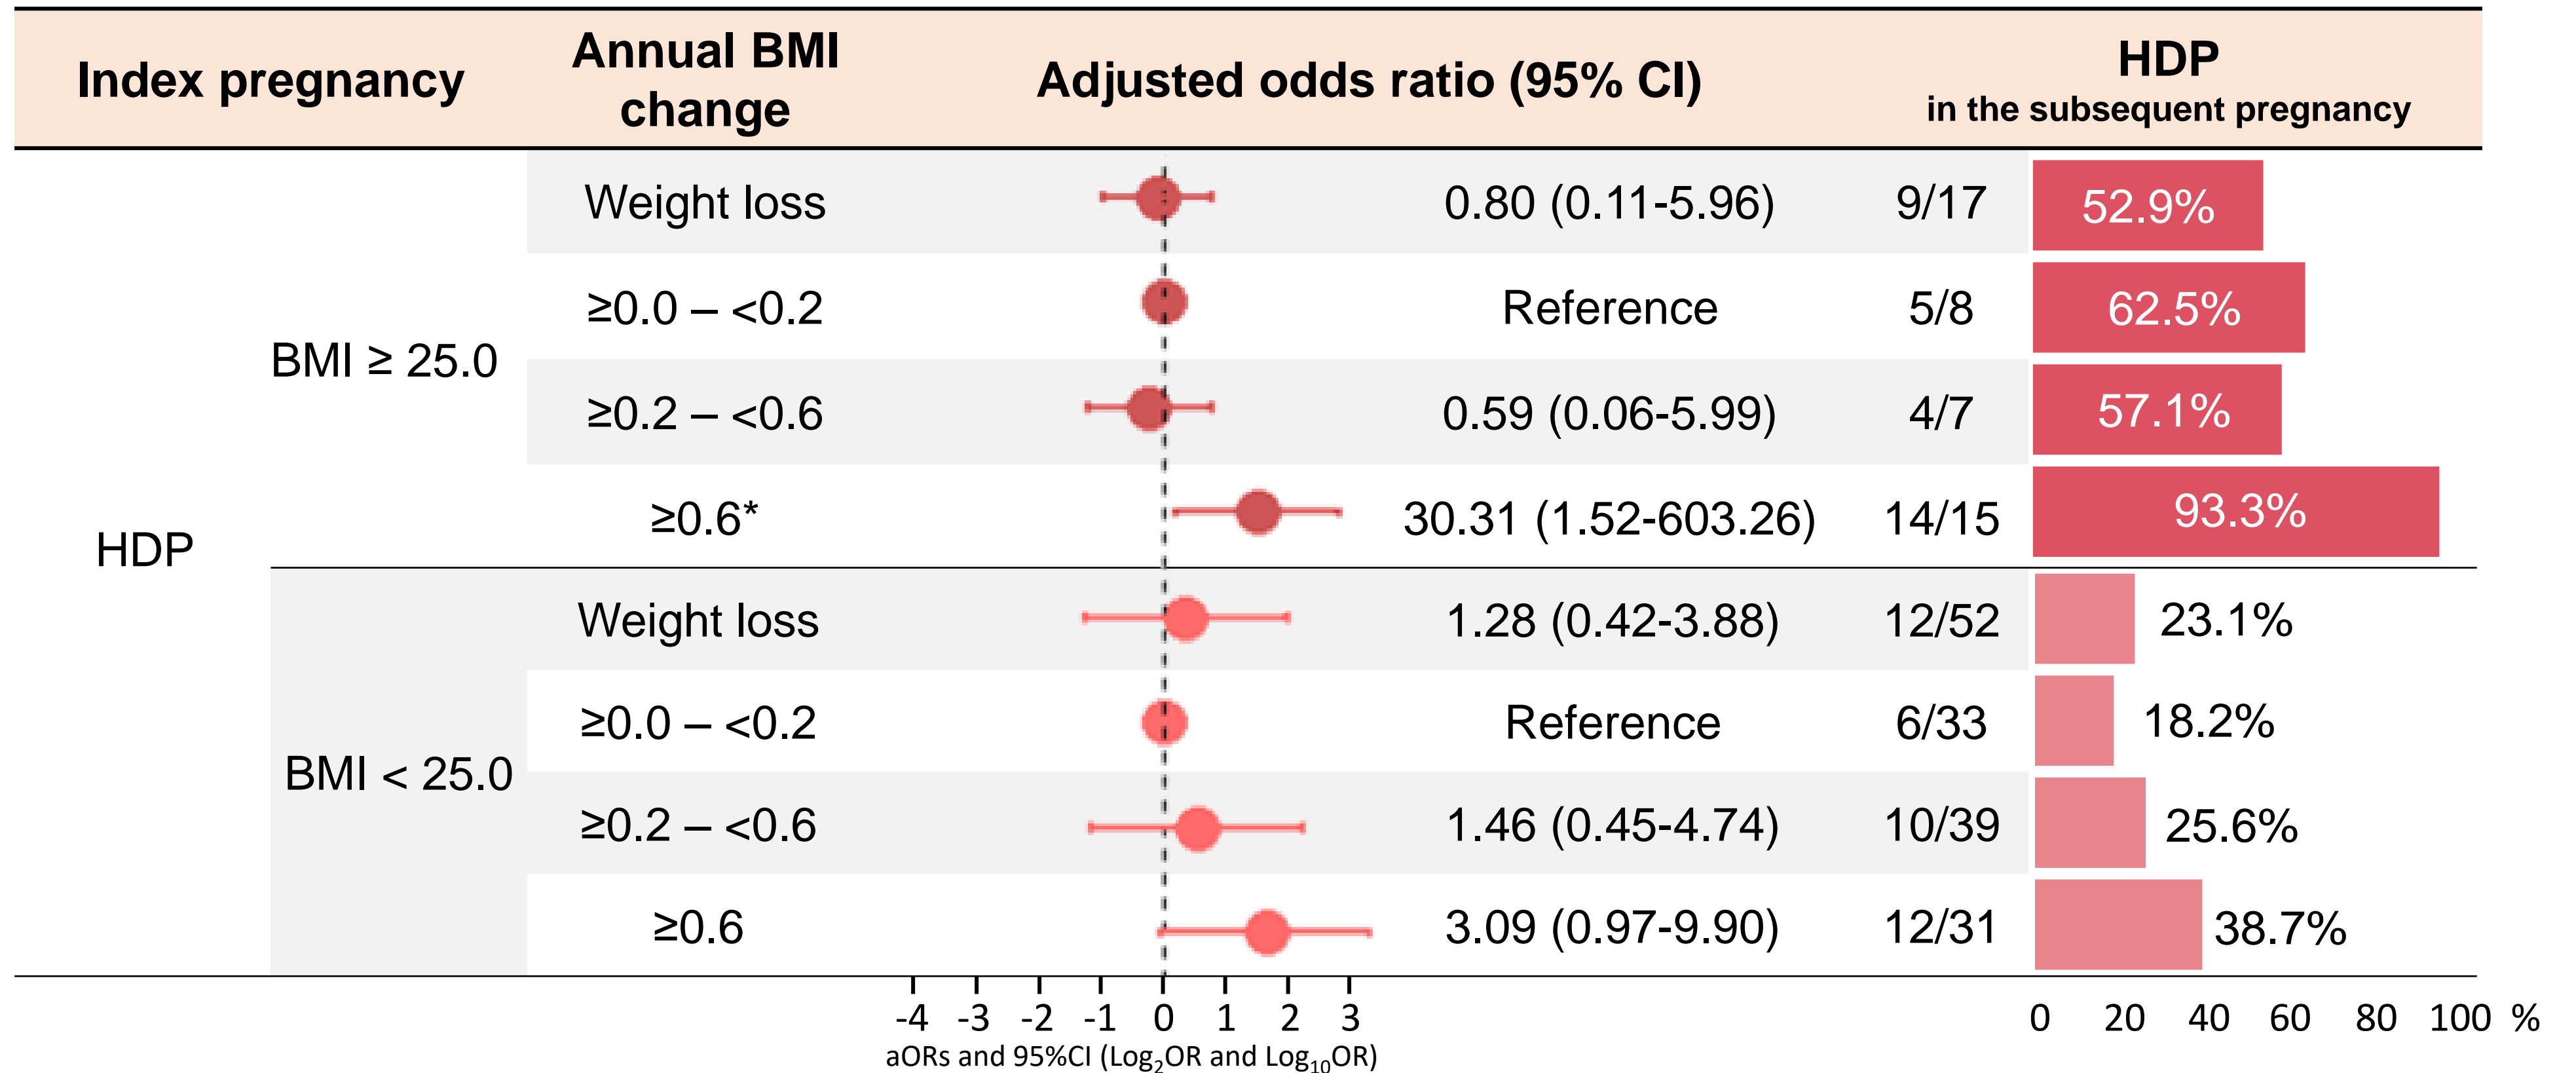

Supplement: 41598_2021_1976_MOESM3_ESM.pdf [file 41598_2021_1976_MOESM3_ESM.pdf]
